# Supplementary material for: Indomethacin reproducibly induces metamorphosis in Cassiopea xamachana scyphistomae
Source: PeerJ. 2017 Mar 1;5:e2979. doi: 10.7717/peerj.2979 (PMC5335687; doi:10.7717/peerj.2979)
Supplement: Supplemental Information 2 — Data used to construct the figure showing the comparison of strobilation induction by indomethacin with that by 9-cis-retinoic acid. [file peerj-05-2979-s002.xlsx]

## Sheet: Hoja1
Induccion de la metamorfosis en Cassiopea xamachana con 1 µM de 9 cis retinol como control de la estrobilación 50 µM de Indometacina
	Dia 1				Dia 2				Dia 3 *				Dia 4				Dia 5				Dia 6				Dia 7				Dia 8				Dia 9				Dia 10
Triplicados/pozo	1	2	3		1	2	3		1	2	3		1	2	3		1	2	3		1	2	3		1	2	3		1	2	3		1	2	3		1	2	3
Agua de mar	0	0	0		0	0	0						0	0	0		0	0	0		0	0	0		0	0	0		0	0	0		0	0	0		0	0	0
DMSO	0	0	0		0	0							0	0			0	0			0	0			0	0			0	0			0	0			0	0
9-cis retinol	0	0	0		0	0	0						0	0	0		0	0	0		0	0	5		0	1	5		4	1	5		4	1	5		4	3	5
Indometacina	0	0	0		0	0	0						0	0	0		5	5	5		5	5	5		5	5	5		5	5	5		5	5	5		5	5	5
		En el tercer tratamiento con DMSO el dia 2, todos los polipos se desintegradon; esto pudo ser efecto de que estaban aun contaminados con bacteria.
		Empieza a haber signos de estrobilacion, el pedunculo se achata en la parte cercana a caliz; (estrobilo temprano),coloracion amarillenta
	*	Este dia no revise los polipos, fue el dia que no fui por cuestiones de salud.
	1	2	4	5	6	7	8	9	10		1	2	4	5	6	7	8	9	10		1	2	4	5	6	7	8	9	10
Agua de mar	0	0	0	0	0	0	0	0	0		0	0	0	0	0	0	0	0	0		0	0	0	0	0	0	0	0	0
DMSO	0	0	0	0	0	0	0	0	0		0	0	0	0	0	0	0	0	0		0	0	0	0	0	0	0	0	0
9-cis retinol	0	0	0	0	1.66667	2	3.33333	3.33333	4		0	0	0	0	34	40	66	66	80		0	0	0	2.88675	2.64575	2.08167	2.08167	2.08167	1
Indometacina	0	0	0	5	5	5	5	5	5		0	0	0	100	100	100	100	100	100		0	0	0	0	0	0	0	0	0
			PROMEDIOS								PORCENTAJE										DESV ST
