# Supplementary material for: Indomethacin reproducibly induces metamorphosis in Cassiopea xamachana scyphistomae
Source: PeerJ. 2017 Mar 1;5:e2979. doi: 10.7717/peerj.2979 (PMC5335687; doi:10.7717/peerj.2979)
Supplement: Supplemental Information 3 — Raw data for Fig. 4. Controls or indomethacin concentrations used and strobilation results after days of treatment. Five polyps per well in triplicate wells were employed for every treatment. The number of polyps undergoing metamorphosis (numbers in red) was quantified on the mentioned day. No. of strobilating polyps was converted to percentages (numbers in black) and used for the statistical analysis. [file peerj-05-2979-s003.xlsx]

## Sheet: Hoja1
	Raw data for Fig 4. Controls or indomethacin concentrations used and strobilation results after days of treatment.
Five polyps per well in triplicate wells were employed for every treatment.
The number of polyps undergoing metamorphosis (numbers in red) was quantified on the mentioned day.
	No. of strobilating polyps was converted to percentages (numbers in black) and used for the statistical analysis.
	Day 5
	Control treatments or Indomethacin concentrations
5 polyps/well	Sea water	DMSO	0.5 µM	1 µM	5 µM	10 µM	25 µM	50 µM
well 1	0 (0%)	0 (0%)	0 (0%)	0 (0%)	3 (60%)	2 (40%)	3 (60%)	3 (60%)
well 2	0 (0%)	0 (0%)	0 (0%)	0 (0%)	2 (40%)	2 (40%)	0 (0%)	2 (40%)
well 3	0 (0%)	0 (0%)	0 (0%)	0 (0%)	1 (20%)	2 (40%)	3 (60%)	3 (60%)
	Day 6
	Control treatments or indomethacin concentrations
5 polyps/well	Sea water	DMSO	0.5 µM	1 µM	5 µM	10 µM	25 µM	50 µM
well 1	0 (0%)	0 (0%)	2 (40%)	2 (40%)	4 (80%)	4 (80%)	4 (80%)	5 (100%)
well 2	0 (0%)	0 (0%)	1 (20%)	2 (40%)	3 (60%)	3 (60%)	3 (60%)	4 (80%)
well 3	0 (0%)	0 (0%)	0 (0%)	1 (20%)	3 (60%)	4 (80%)	4 (80%)	5 (100%)
	Day 7
	Control treatments or indomethacin concentrations
5 polyps/well	Sea water	DMSO	0.5 µM	1 µM	5 µM	10 µM	25 µM	50 µM
well 1	0 (0%)	0 (0%)	4 (80%)	3 (60%)	4 (80%)	5 (100%)	5 (100%)	5 (100%)
well 2	0 (0%)	0 (0%)	3 (60%)	2 (40%)	4 (80%)	4 (80%)	4 (80%)	4 (80%)
well 3	0 (0%)	0 (0%)	3 (60%)	3 (60%)	4 (80%)	5 (100%)	5 (100%)	5 (100%)
	Day 8
	Control treatments or indomethacin concentrations
5 polyps/ well	Sea water	DMSO	0.5 µM	1 µM	5 µM	10 µM	25 µM	50 µM
well 1	0 (0%)	0 (0%)	4 (80%)	3 (60%)	4 (80%)	5 (100%)	5 (100%)	5 (100%)
well 2	0 (0%)	0 (0%)	4 (80%)	3 (60%)	4 (80%)	4 (80%)	4 (80%)	4 (80%)
well 3	0 (0%)	0 (0%)	4 (80%)	4 (80%)	4 (80%)	5 (100%)	5 (100%)	5 (100%)
